# Supplementary material for: Construction and structural transformation of two coordination sphere supramolecular isomers based on Co(ii) and 4-(2-pyridyl)-NH-1,2,3-triazole via one-pot synthesis
Source: Royal Society of Chemistry journal article supplement (doi:10.1039/d2ce01069k), 2022-01-01
Supplement: d2ce01069k1.pdf [file d2ce01069k1.pdf]

**Construction and Structural Transformation of  
Two Coordination Sphere Supramolecular  
Isomers Based on Co(II) and 4-(2-Pyridyl)-NH-  
1,2,3-Triazole *via* One-Pot Synthesis**

**Supporting information**

## Supramolecular interactions

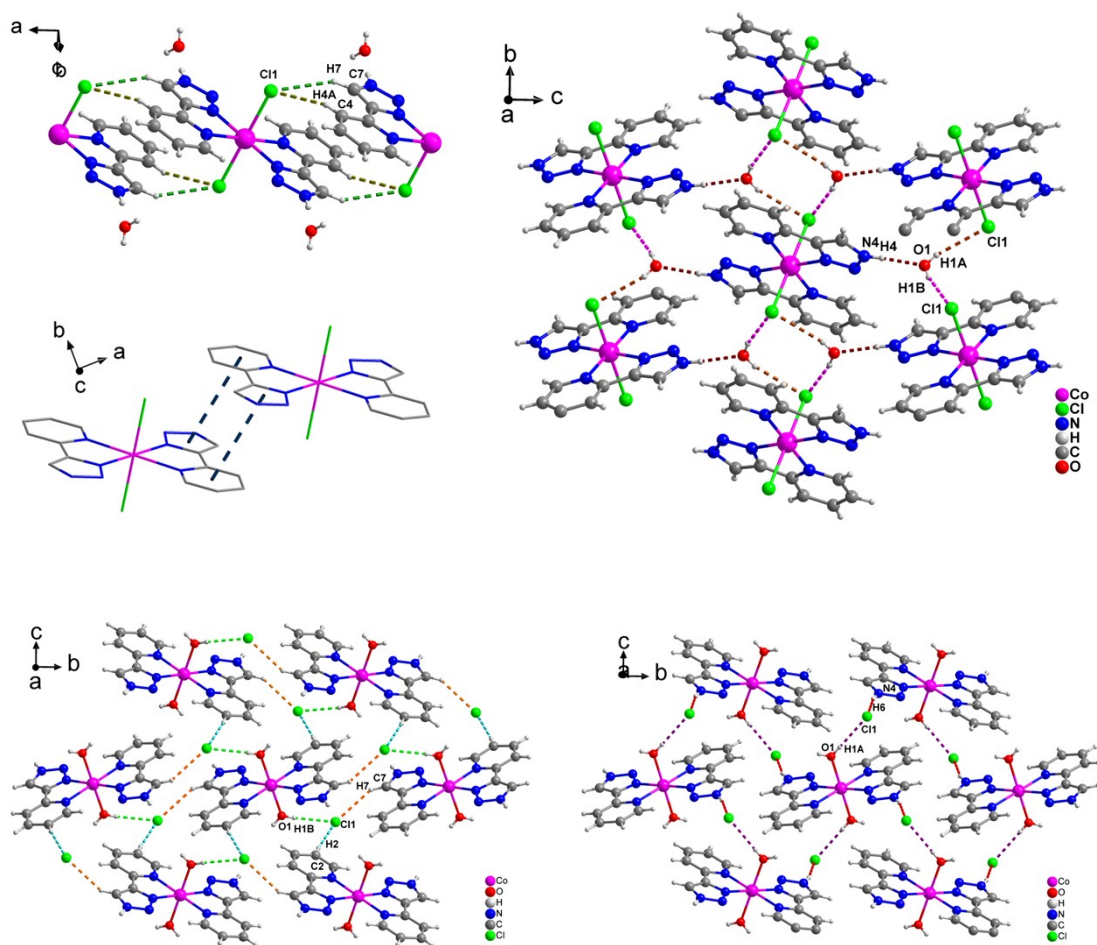

**Figure S1** Hydrogen bonding of Co-Cl and Co-H<sub>2</sub>O.

**Table S1** Hydrogen bond geometries of Co-Cl and Co-H<sub>2</sub>O.

| D                        | H   | A   | H···A(Å)  | D···A(Å)  | D-H···A(°) | Symmetry Operation     |
|--------------------------|-----|-----|-----------|-----------|------------|------------------------|
| <b>Co-Cl</b>             |     |     |           |           |            |                        |
| O1                       | H1A | Cl1 | 2.569(32) | 3.243(3)  | 167(3)     | x,y,z                  |
| O1                       | H1B | Cl1 | 2.372(44) | 3.138(3)  | 168(4)     | x,2-y,-z               |
| N4                       | H4  | O1  | 1.900(31) | 2.698(3)  | 174(3)     | 1/2+x,3/2-y,-<br>1/2+z |
| <b>Co-H<sub>2</sub>O</b> |     |     |           |           |            |                        |
| O1                       | H1A | Cl1 | 2.413(28) | 3.147(19) | 175(3)     | -1/2+x,3/2-<br>y,1/2+z |
| O1                       | H1B | Cl1 | 2.480(31) | 3.243(2)  | 169(3)     | 1-x,1-y,-z             |
| N4                       | H4  | Cl1 | 2.238(28) | 3.085(2)  | 167(2)     | x,y,z                  |

## Time dependent photography

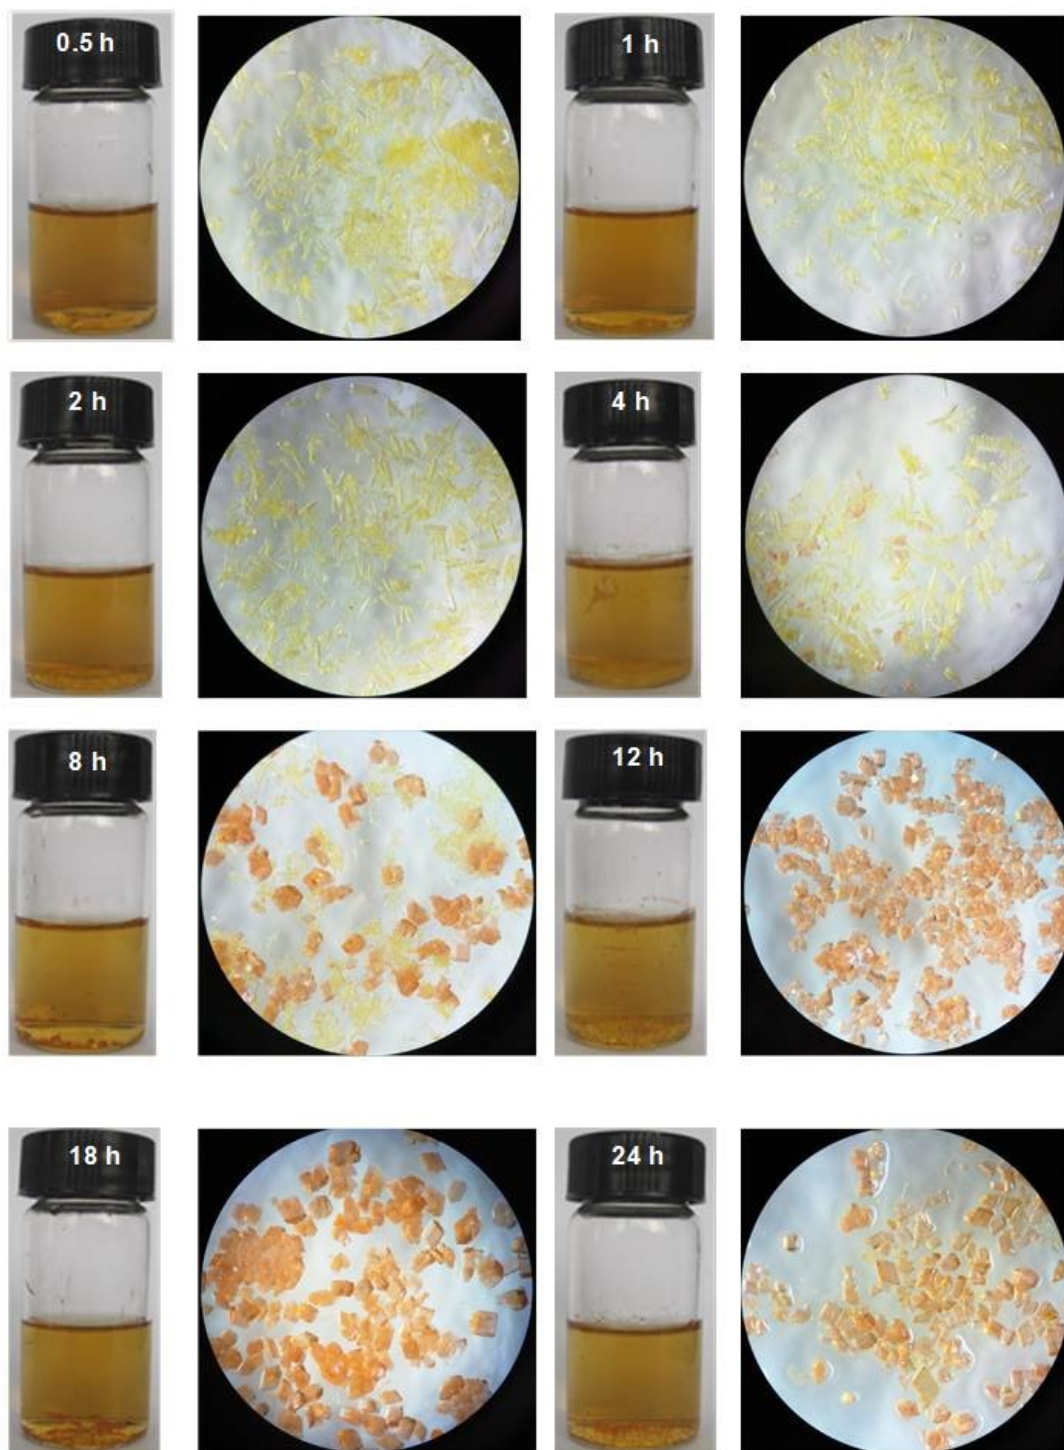

**Figure S2** Time dependent photography for solvothermal reaction at 80°C.

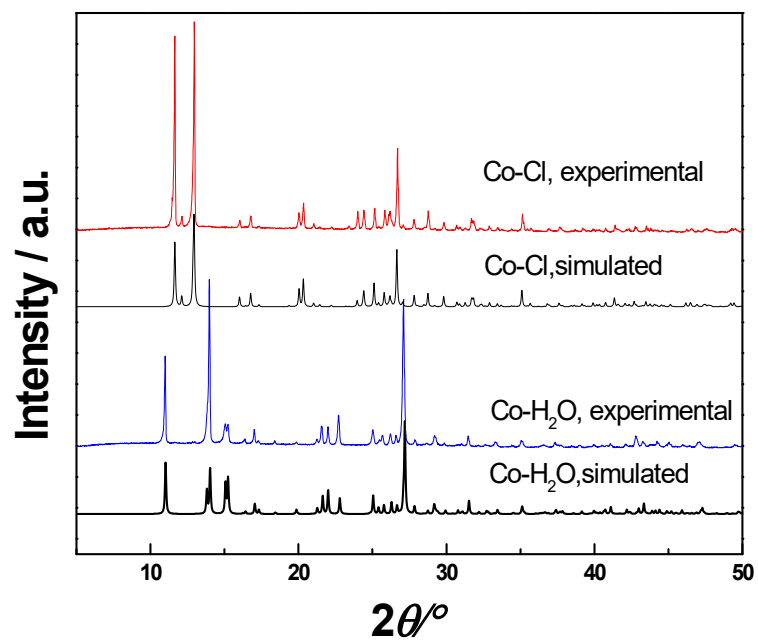

**Figure S3** Experimental and simulated PXR D patterns for **Co-Cl** and **Co-H<sub>2</sub>O**.

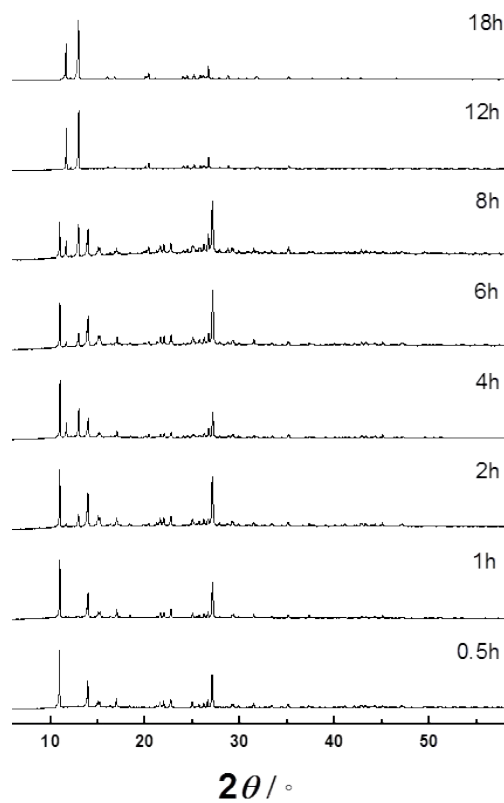

**Figure S4** Time dependent powder X-ray pattern for reaction at 80°C.

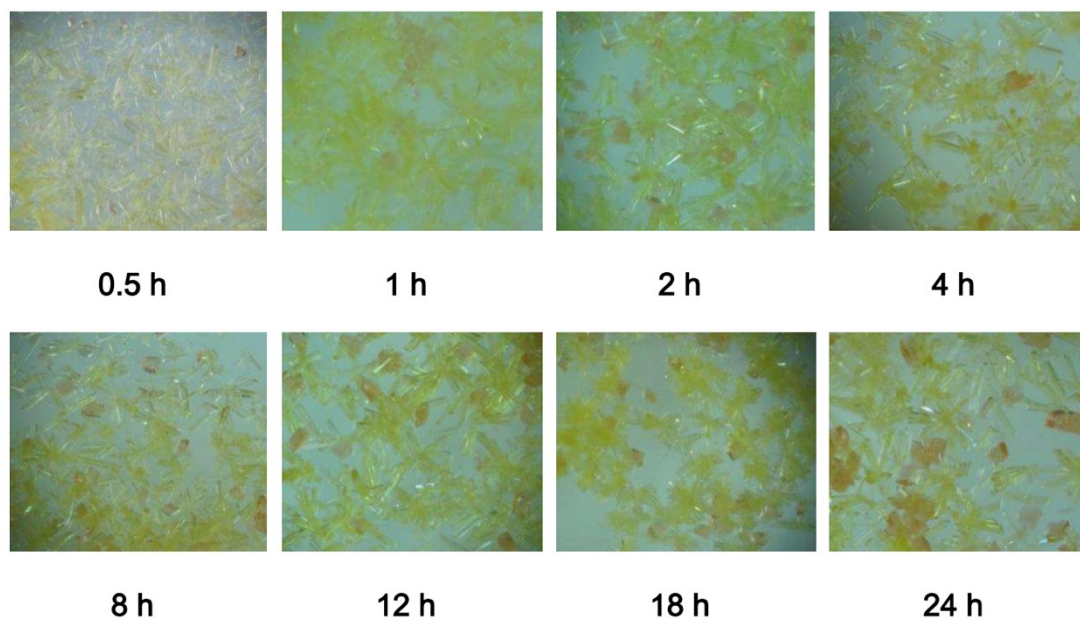

**Figure S5** Time dependent photography for solvothermal reaction at 60°C.

## ESI-MS

**Table S2** Peak assignments of the ESI-MS spectrum (positive mode) of single crystal of Co-Cl.

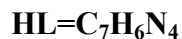

| Intensity | m/z    | m/z(cal) | fragments                                                                              |
|-----------|--------|----------|----------------------------------------------------------------------------------------|
| 0.52045   | 147.07 | 147.07   | [HL+H] <sup>+</sup>                                                                    |
| 1         | 175.52 | 175.53   | [Co(HL) <sub>2</sub> ] <sup>2+</sup>                                                   |
| 0.33225   | 196.04 | 196.04   | [Co(CH <sub>3</sub> CN)(CH <sub>3</sub> OH) <sub>3</sub> ] <sup>2+</sup>               |
| 0.00266   | 204.99 | 204.99   | [CoL+H] <sup>+</sup>                                                                   |
| 0.28689   | 248.55 | 248.55   | [Co(HL) <sub>3</sub> ] <sup>2+</sup>                                                   |
| 0.0255    | 280.99 | 280.99   | [Co(HL)(CH <sub>3</sub> CN)Cl] <sup>2+</sup>                                           |
| 0.01195   | 286.04 | 286.04   | [Co (HL) (CH <sub>3</sub> CN) <sub>2</sub> ] <sup>2+</sup>                             |
| 0.55118   | 350.04 | 350.04   | [Co(HL)(L)] <sup>+</sup>                                                               |
| 0.12681   | 386.02 | 386.02   | [Co(HL) <sub>2</sub> Cl] <sup>+</sup>                                                  |
| 0.00598   | 422.57 | 422.57   | [Co <sub>2</sub> L <sub>3</sub> (HL) <sub>2</sub> ] <sup>2+</sup>                      |
| 6.27E-4   | 428.06 | 428.06   | [Co(HL) <sub>2</sub> Cl(CH <sub>3</sub> CN)H] <sup>+</sup>                             |
| 0.01355   | 451.53 | 451.53   | [Co <sub>3</sub> (L) <sub>5</sub> H] <sup>2+</sup>                                     |
| 0.00107   | 483.96 | 483.96   | [Co <sub>2</sub> (L) <sub>2</sub> Cl(CH <sub>3</sub> CN)] <sup>+</sup>                 |
| 0.13417   | 495.09 | 495.09   | [Co <sub>2</sub> (L) <sub>2</sub> (HL)] <sup>+</sup>                                   |
| 0.01013   | 553.02 | 553.02   | [Co <sub>2</sub> (L) <sub>3</sub> ] <sup>2+</sup>                                      |
| 0.00148   | 588.99 | 589.00   | [Co <sub>2</sub> (L) <sub>3</sub> ClH] <sup>+</sup>                                    |
| 0.00321   | 597.08 | 597.07   | [Co <sup>III</sup> <sub>2</sub> Co <sup>II</sup> (HL) (L) <sub>6</sub> ] <sup>2+</sup> |
| 0.006     | 699.08 | 699.08   | [Co <sub>2</sub> (L) <sub>3</sub> (HL)] <sup>+</sup>                                   |
| 0.00288   | 734.05 | 734.05   | [Co <sub>2</sub> (L) <sub>3</sub> (HL)Cl] <sup>+</sup>                                 |

0.00129

791.97

791.97

 $[\text{Co}_3(\text{L})_4\text{Cl}]^+$ 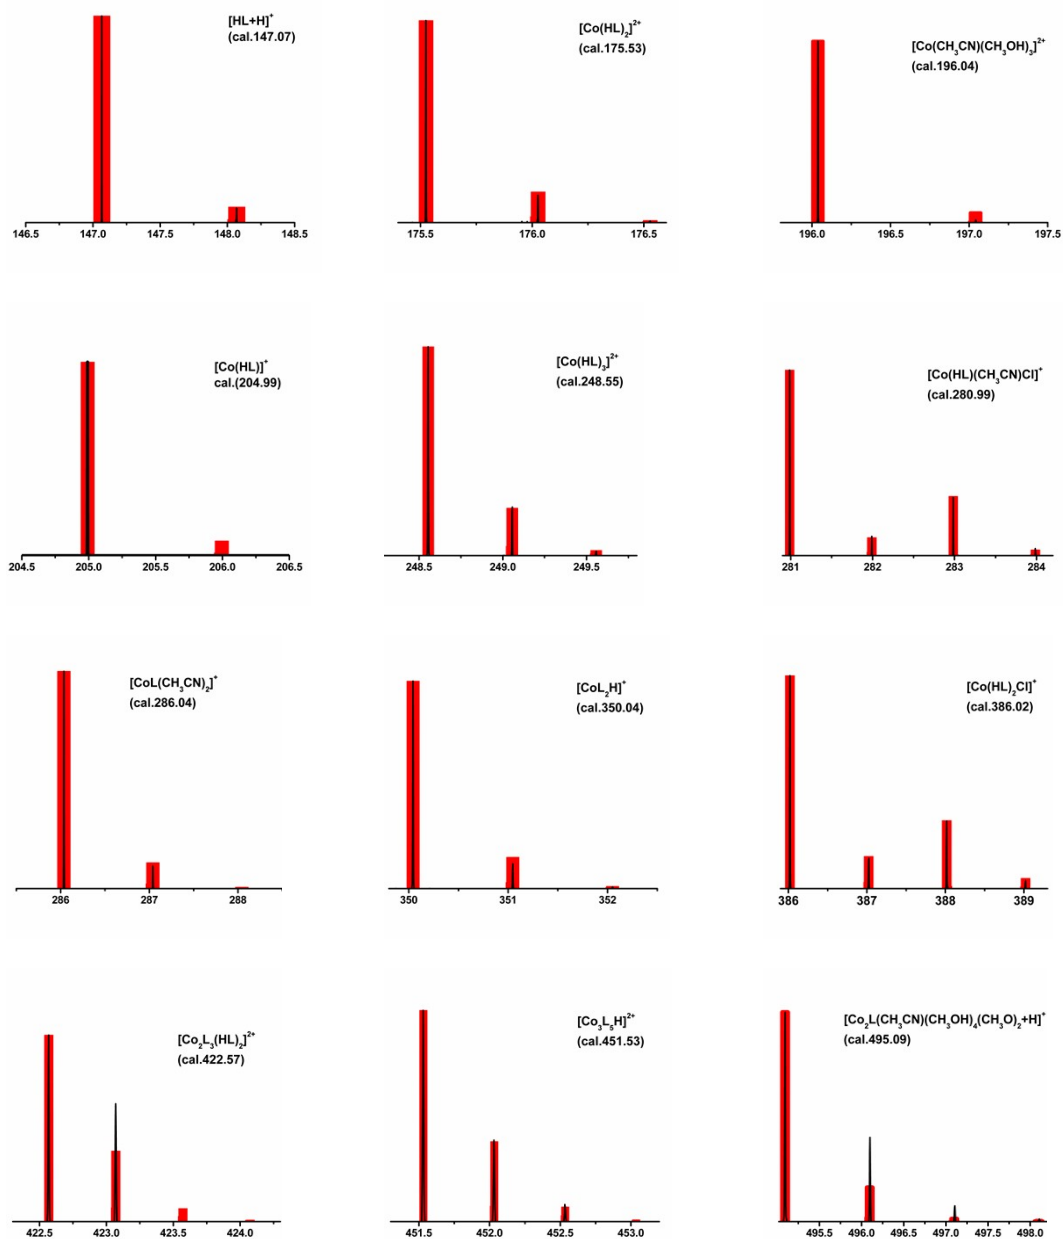

**Figure S6** Representation of the calculated peaks fit experimental species present in the ESI-MS spectrum (positive mode) of Co-Cl.

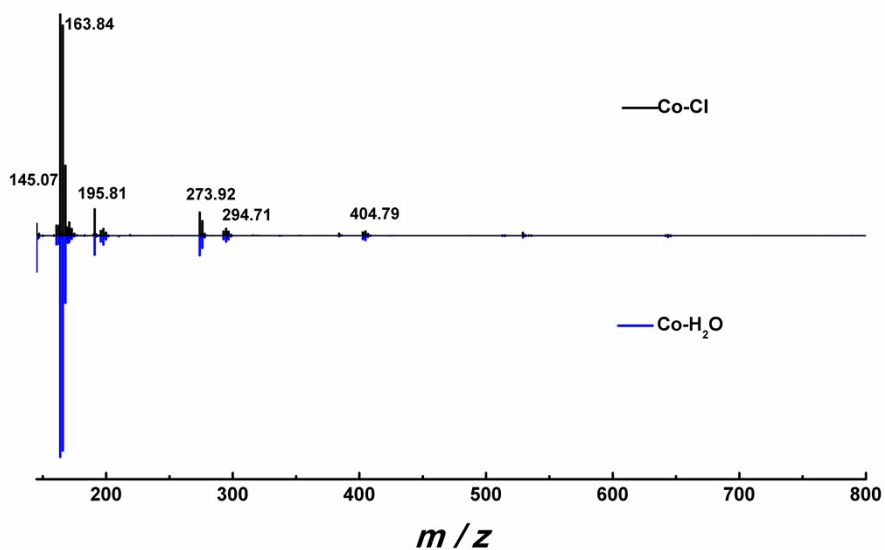

**Figure S7** Negative mode ESI-MS of **Co-Cl**.

**Table S3** Peak assignments of the ESI-MS spectrum (negative mode) of single crystal of **Co-Cl**.

**HL=C<sub>7</sub>H<sub>6</sub>N<sub>4</sub>**

| Intensity   | m/z    | m/z(cal) | Fragments                                                      |
|-------------|--------|----------|----------------------------------------------------------------|
| 0.05606     | 145.07 | 145.07   | L <sup>-</sup>                                                 |
| 1           | 163.84 | 163.84   | [CoCl <sub>3</sub> ] <sup>-</sup>                              |
| 0.10663     | 273.92 | 273.92   | [CoLCl <sub>2</sub> ] <sup>-</sup>                             |
| 0.03317     | 294.71 | 294.71   | [Co <sub>2</sub> Cl <sub>5</sub> ] <sup>-</sup>                |
| 0.01137     | 384.01 | 384.00   | [CoL <sub>2</sub> Cl] <sup>-</sup>                             |
| 0.02137     | 404.79 | 404.79   | [Co <sub>2</sub> LCl <sub>4</sub> ] <sup>-</sup>               |
| 9.98099E-4  | 423.58 | 423.58   | [Co <sub>3</sub> Cl <sub>7</sub> ] <sup>-</sup>                |
| 0.0032523   | 512.87 | 512.87   | [Co <sub>2</sub> L <sub>2</sub> Cl <sub>3</sub> ] <sup>-</sup> |
| 0.00315     | 533.66 | 533.66   | [Co <sub>3</sub> LCl <sub>6</sub> ] <sup>-</sup>               |
| 1.37197E-4  | 622.96 | 622.96   | [Co <sub>2</sub> L <sub>3</sub> Cl <sub>2</sub> ] <sup>-</sup> |
| 1.169E-5    | 662.53 | 662.53   | [Co <sub>4</sub> LCl <sub>8</sub> ] <sup>-</sup>               |
| 0.00540126  | 643.74 | 643.74   | [Co <sub>3</sub> L <sub>2</sub> Cl <sub>5</sub> ] <sup>-</sup> |
| 6.26836E-4  | 753.83 | 753.83   | [Co <sub>3</sub> L <sub>3</sub> Cl <sub>4</sub> ] <sup>-</sup> |
| 4.12906E-4  | 772.61 | 772.61   | [Co <sub>4</sub> L <sub>2</sub> Cl <sub>7</sub> ] <sup>-</sup> |
| 0.00130819  | 882.70 | 882.70   | [Co <sub>4</sub> L <sub>3</sub> Cl <sub>6</sub> ] <sup>-</sup> |
| 3.601568E-5 | 992.78 | 992.78   | [Co <sub>4</sub> L <sub>4</sub> Cl <sub>5</sub> ] <sup>-</sup> |

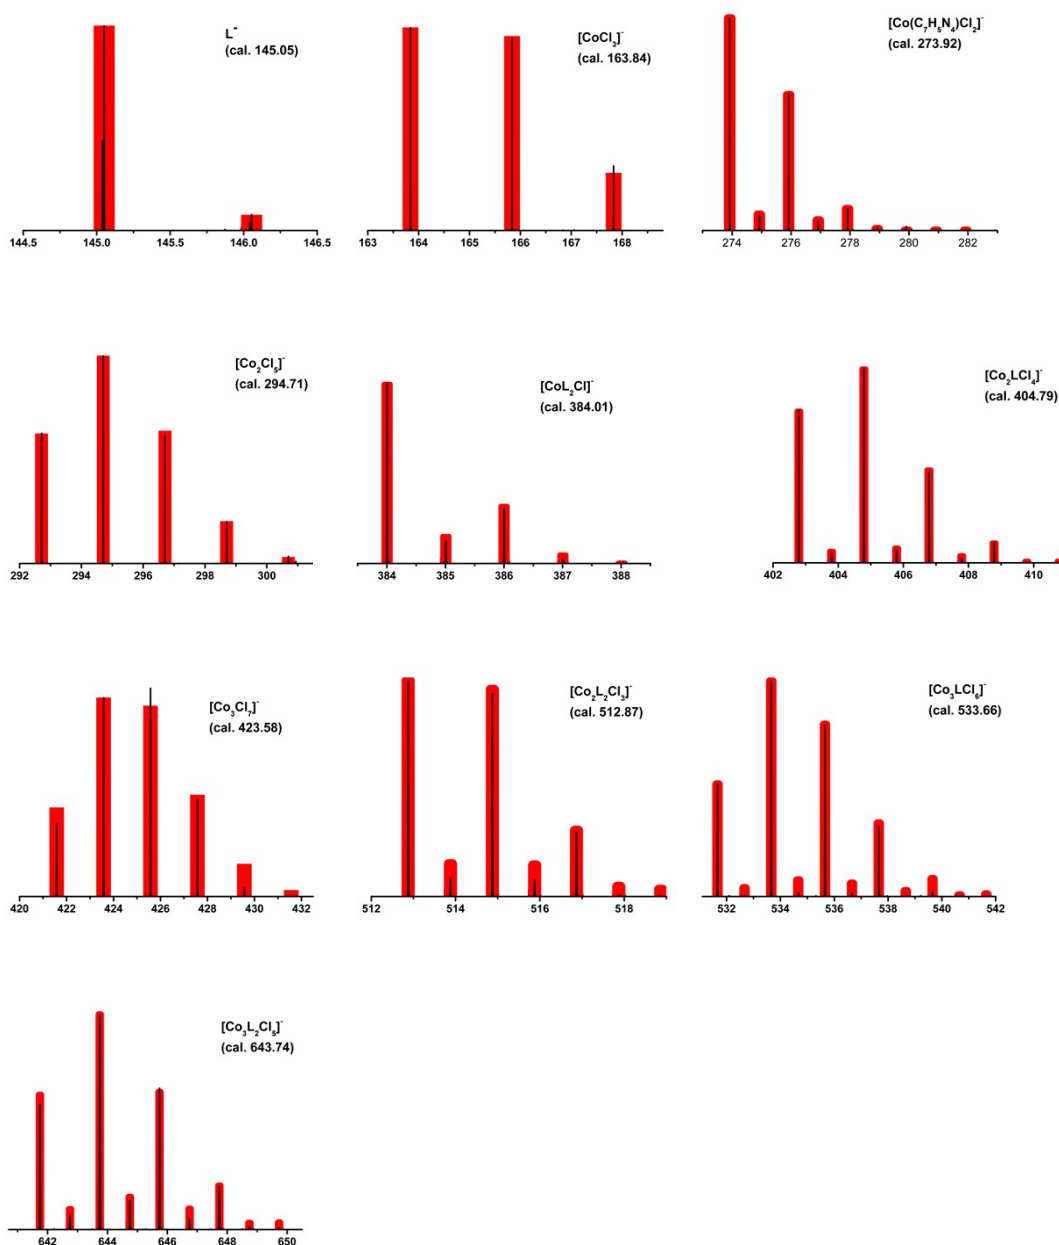

**Figure S8** Representation of the calculated peaks fit experimental species present in the ESI-MS spectrum (negative mode) of **Co-Cl**.

## Theoretical calculations

**Table S4** MS calculated results of **Co-Cl** and **Co-H<sub>2</sub>O** crystal.

|                          | Energy type | Total energy  |
|--------------------------|-------------|---------------|
| <b>Co-Cl</b>             | Crystal     | -6865.4339487 |
|                          | Optimized   | -6867.3638070 |
| <b>Co-H<sub>2</sub>O</b> | Crystal     | -6866.6352352 |



**Table S5** Designed species involved in the possible reaction route for forming **Co-Cl** and **Co-H<sub>2</sub>O** from **CoCl<sub>2</sub>·6H<sub>2</sub>O** and ligand.

|                                                                      | Reactant                                                                                                                                  | Product 1                                                                                                    | Product 2                                                                                                                  |
|----------------------------------------------------------------------|-------------------------------------------------------------------------------------------------------------------------------------------|--------------------------------------------------------------------------------------------------------------|----------------------------------------------------------------------------------------------------------------------------|
|                                                                      | 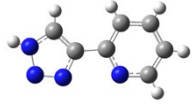<br>2 L<br>G= -489.347446                                |                                                                                                              |                                                                                                                            |
|                                                                      | <br>CoCl <sub>2</sub> w <sub>4</sub> _1<br>-1372.238361  | <br>Co-Cl<br>-2045.200333   | <br>Co-H <sub>2</sub> O<br>-1277.214180 |
|                                                                      | <br>CoCl <sub>2</sub> w <sub>4</sub> _2<br>-1372.238361 |                                                                                                              |                                                                                                                            |
|                                                                      |                                                                                                                                           | <br>4 water<br>-76.438846 | <br>2 water<br>-76.438846             |
|                                                                      |                                                                                                                                           |                                                                                                              | <br>2 Cl-<br>-460.428958              |
| Summary of G<br>(CoCl <sub>2</sub> w <sub>4</sub> _2 as<br>reactant) | -2350.933253                                                                                                                              | -2350.955717                                                                                                 | -2350.949788                                                                                                               |

**Table S6** Bond order analysis in the optimized complexes of **Co-Cl** and **Co-H<sub>2</sub>O**.

|            | Co-Cl      | Co-H <sub>2</sub> O |
|------------|------------|---------------------|
| Co-Cl/O(w) | 0.73742886 | 0.19343212          |
| Co-N1      | 0.26582501 | 0.32380175          |
| Co-N2      | 0.23380482 | 0.30608899          |

**Table S7** Calculated complexation energies (kcal/mol) between  $[\text{Co}(\text{HL})_2\text{Cl}_2]\cdot 2\text{H}_2\text{O}$  monomer and all of its possible neighbors in **Co-Cl** crystals.

|   | <b>Co-Cl</b> | <b>Energy a(b)</b> | <b>Interaction Types and Scheme</b>                                                  |
|---|--------------|--------------------|--------------------------------------------------------------------------------------|
|   |              |                    | Cl $\cdots$ Cl (4.599)                                                               |
| 1 | dimer11_14   | 2.54(3.18)         | 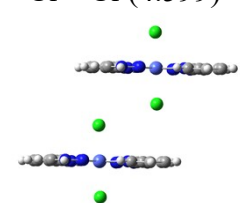   |
|   |              |                    | O-H $\cdots$ Cl (3.138)                                                              |
| 2 | dimer11_14   | -9.51(-6.91)       |    |
|   |              |                    | O-H $\cdots$ Cl (3.243)                                                              |
| 3 | dimer11_14   | -7.59(-5.04)       |   |
|   |              |                    | O-H $\cdots$ Py (3.627)                                                              |
| 4 | dimer11_14   | -1.56(-0.52)       |  |
|   |              |                    | Cl $\cdots$ Cl (7.156)                                                               |
| 5 | dimer31_14   | -1.31(-0.44)       |  |
|   |              |                    | Cl $\cdots$ Cl (8.861)                                                               |
| 6 | dimer32_14   | -5.56(-4.97)       |  |
| 7 | dimer34_14   | -1.31(-0.44)       | Cl $\cdots$ Cl (7.156)                                                               |

|    |            |                |                                                                                      |
|----|------------|----------------|--------------------------------------------------------------------------------------|
|    |            |                | 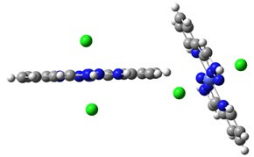   |
|    |            |                | Cl...Cl (8.861)                                                                      |
| 8  | dimer35_14 | -5.56(-4.97)   |    |
|    |            |                | Cl...Cl (8.861)                                                                      |
| 9  | dimer40_14 | -5.56(-4.97)   |    |
|    |            |                | Cl...Cl (7.156)                                                                      |
| 10 | dimer41_14 | -1.31(-0.44)   |   |
|    |            |                | N...H <sub>2</sub> O (2.698)                                                         |
| 11 | dimer41_14 | -7.66(-5.86)   |  |
|    |            |                | Cl...Cl (8.861)                                                                      |
| 12 | dimer43_14 | -5.56(-4.97)   |  |
|    |            |                | Cl...Cl (7.156)                                                                      |
| 13 | dimer44_14 | -1.31(-0.44)   |  |
|    |            |                | Cl...Cl (11.548)                                                                     |
| 14 | dimer50_14 | 0.25(0.26)     |  |
|    |            |                | N...H <sub>2</sub> O (2.698)                                                         |
| 15 | dimer5_14  | -18.03(-16.09) |  |
|    |            |                | Cl...Cl (7.167)                                                                      |

16 dimer8\_14 -0.98(-0.37)

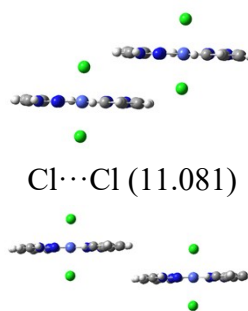

<sup>a</sup> Energy without Basis Set Superposition Error (BSSE) correction; <sup>b</sup> Energy after BSSE correction.

**Table S8** Calculated complexation energies (kcal/mol) between  $[\text{CoL}_2(\text{H}_2\text{O})_2]\cdot\text{Cl}_2$  monomer and all possible neighbors in **Co-H<sub>2</sub>O** crystals.

|   | <b>Co-H<sub>2</sub>O</b> | <b>Energy a(b)</b> | <b>Interaction Types and Scheme</b>                                                                    |
|---|--------------------------|--------------------|--------------------------------------------------------------------------------------------------------|
|   |                          |                    | O...O (8.982)                                                                                          |
| 1 | dimer11_14               | 128.38(128.98)     | 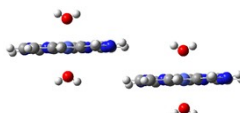<br>O...O (8.982)    |
| 2 | dimer17_14               | 128.38(128.98)     | <br>O...O (11.631) |
| 3 | dimer20_14               | 90.14(90.15)       | <br>O...O (12.951) |
| 4 | dimer26_14               | 112.99(113.04)     | <br>O...O (15.317) |
| 5 | dimer29_14               | 83.81(79.84)       |                    |
| 6 | dimer37_14               | 136.43(134.14)     | O...O (5.765)                                                                                          |

|    |            |                  |                                                                                                                       |
|----|------------|------------------|-----------------------------------------------------------------------------------------------------------------------|
|    |            |                  | 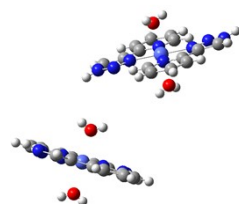 <p>O···O (7.988)</p>               |
| 7  | dimer38_14 | 133.96(135.47)   |  <p>H<sub>2</sub>O···Cl (3.118)</p> |
| 8  | dimer40_14 | -128.90(-132.01) |  <p>H<sub>2</sub>O···Cl (3.141)</p> |
| 9  | dimer40_14 | -132.71(-131.28) |  <p>N···Cl (3.075)</p>             |
| 10 | dimer40_14 | -126.15(-125.41) |  <p>O···O (5.765)</p>             |
| 11 | dimer40_14 | 136.44(138.65)   |  <p>Py···Cl (3.675)</p>           |
| 12 | dimer40_14 | -118.04(-117.22) |                                   |
| 13 | dimer41_14 | 133.96(135.47)   | <p>O···O (7.988)</p>                                                                                                  |

|    |            |                  |                                                                                      |
|----|------------|------------------|--------------------------------------------------------------------------------------|
|    |            |                  | 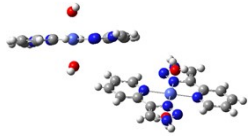   |
|    |            |                  | O···O (7.988)                                                                        |
| 14 | dimer46_14 | 133.96(135.47)   |    |
|    |            |                  | O···O (5.765)                                                                        |
| 15 | dimer47_14 | 136.44(138.65)   |    |
|    |            |                  | O···O (7.988)                                                                        |
| 16 | dimer49_14 | 133.96(135.47)   |   |
|    |            |                  | Py···Cl (3.769)                                                                      |
| 17 | dimer49_14 | -105.24(-104.73) |  |
|    |            |                  | O···O (5.765)                                                                        |
| 18 | dimer50_14 | 136.44(134.14)   |  |
|    |            |                  | O···O (8.494)                                                                        |
| 19 | dimer5_14  | 145.20(146.27)   |  |
|    |            |                  | O···O (11.631)                                                                       |
| 20 | dimer8_14  | 90.14(90.15)     |  |

---

<sup>a</sup> Energy without Basis Set Superposition Error (BSSE) correction; <sup>b</sup> Energy after BSSE correction.

## Crystallographic Data Tables

**Table S9** Crystallography data and refinement parameters for **Co-Cl** and **Co-H<sub>2</sub>O**.

| Compound                                     | Co[(HL) <sub>2</sub> Cl <sub>2</sub> ] <sub>2</sub> ·2H <sub>2</sub> O                                               | Co[(HL) <sub>2</sub> (H <sub>2</sub> O) <sub>2</sub> ]Cl <sub>2</sub>                                                 |
|----------------------------------------------|----------------------------------------------------------------------------------------------------------------------|-----------------------------------------------------------------------------------------------------------------------|
| CCDC                                         | 2177958                                                                                                              | 2177960                                                                                                               |
| Empirical formula                            | C <sub>14</sub> H <sub>16</sub> Cl <sub>2</sub> CoN <sub>8</sub> O <sub>2</sub>                                      | C <sub>14</sub> H <sub>16</sub> Cl <sub>2</sub> CoN <sub>8</sub> O <sub>2</sub>                                       |
| Formula weight                               | 458.18                                                                                                               | 458.18                                                                                                                |
| Temperature                                  | 293 K                                                                                                                | 293 K                                                                                                                 |
| Wavelength                                   | 0.71073 Å                                                                                                            | 0.71073 Å                                                                                                             |
| Crystal system                               | Monoclinic                                                                                                           | Monoclinic                                                                                                            |
| Space group                                  | <i>P</i> 2 <sub>1</sub> / <i>n</i>                                                                                   | <i>P</i> 2 <sub>1</sub> / <i>n</i>                                                                                    |
| Unit cell dimensions                         | <i>a</i> =8.0159(5) <i>α</i> =90°<br><i>b</i> =7.6491(6) <i>β</i> =94.218(6)°<br><i>c</i> =15.2205(11) <i>γ</i> =90° | <i>a</i> =7.0384(8) <i>α</i> =90°<br><i>b</i> =10.3897(8) <i>β</i> =95.857(10)<br><i>c</i> =12.6776(11) <i>γ</i> =90° |
| Volume                                       | 930.71(11) Å <sup>3</sup>                                                                                            | 922.25(15) Å <sup>3</sup>                                                                                             |
| Z                                            | 2                                                                                                                    | 2                                                                                                                     |
| Density (calculated)                         | 1.628 g cm <sup>-3</sup>                                                                                             | 1.650 g cm <sup>-3</sup>                                                                                              |
| Absorption coefficient                       | 1.237 mm <sup>-1</sup>                                                                                               | 1.249 mm <sup>-1</sup>                                                                                                |
| F(000)                                       | 462.0                                                                                                                | 466.0                                                                                                                 |
| Theta range for data collection              | 3.6680 to 30.5240°                                                                                                   | 3.4570 to 32.8110°                                                                                                    |
| Index ranges                                 | -9 ≤ <i>h</i> ≤ 9<br>-9 ≤ <i>k</i> ≤ 5<br>-18 ≤ <i>l</i> ≤ 18                                                        | -5 ≤ <i>h</i> ≤ 8<br>-12 ≤ <i>k</i> ≤ 12<br>-15 ≤ <i>l</i> ≤ 15                                                       |
| Reflections collected                        | 3395                                                                                                                 | 3522                                                                                                                  |
| Independent reflections                      | 1548 ([ <i>R</i> (int) = 0.0227])                                                                                    | 1596 ([ <i>R</i> (int) = 0.0205])                                                                                     |
| Completeness                                 | 99.9% (theta = 30.5240°)                                                                                             | 99.2% (theta = 25.970°)                                                                                               |
| Goodness-of-fit                              | 1.050                                                                                                                | 1.064                                                                                                                 |
| Final R indices [ <i>I</i> > 2σ( <i>I</i> )] | <i>R</i> 1 = 0.0346, <i>wR</i> 2 = 0.0925                                                                            | <i>R</i> 1 = 0.0260, <i>wR</i> 2 = 0.0632                                                                             |
| R indices (all data)                         | <i>R</i> 1 = 0.0429, <i>wR</i> 2 = 0.1040                                                                            | <i>R</i> 1 = 0.0326, <i>wR</i> 2 = 0.0694                                                                             |

**Table S10** Selected bond length(Å) and angles( °) of **Co-Cl**

| Bond                                  | Length/Angle | Bond                                  | Length/Angle |
|---------------------------------------|--------------|---------------------------------------|--------------|
| Co1—Cl1                               | 2.4744 (7)   | Co1—N1                                | 2.1386 (19)  |
| Co1—Cl1 <sup>i</sup>                  | 2.4743 (7)   | Co1—N2 <sup>i</sup>                   | 2.1281 (19)  |
| Co1—N1 <sup>i</sup>                   | 2.1385 (19)  | Co1—N2                                | 2.1281 (19)  |
| Cl1 <sup>i</sup> —Co1—Cl1             | 180.0        | N2 <sup>i</sup> —Co1—N1               | 102.56 (7)   |
| N1 <sup>i</sup> —Co1—Cl1 <sup>i</sup> | 87.60 (6)    | N2 <sup>i</sup> —Co1—N1 <sup>i</sup>  | 77.44 (7)    |
| N1 <sup>i</sup> —Co1—Cl1              | 92.40 (6)    | N2—Co1—N1                             | 77.43 (7)    |
| N1—Co1—Cl1                            | 87.60 (6)    | N2—Co1—N1 <sup>i</sup>                | 102.57 (7)   |
| N1—Co1—Cl1 <sup>i</sup>               | 92.40 (6)    | N2—Co1—N2 <sup>i</sup>                | 180.0        |
| N1 <sup>i</sup> —Co1—N1               | 180.0        | C5—N1—Co1                             | 116.09 (15)  |
| N2 <sup>i</sup> —Co1—Cl1              | 90.64 (6)    | C1—N1—Co1                             | 126.08 (17)  |
| N2—Co1—Cl1 <sup>i</sup>               | 90.64 (6)    | N2 <sup>i</sup> —Co1—Cl1 <sup>i</sup> | 89.36 (6)    |
| N2—Co1—Cl1                            | 89.36 (6)    |                                       |              |

Symmetry code: (i)  $-x, -y+1, -z$ .**Table S11** Selected bond length(Å) and angles( °) of **Co-H<sub>2</sub>O**

| Bond                                 | Length/Angle | Bond                                 | Length/Angle |
|--------------------------------------|--------------|--------------------------------------|--------------|
| Co1—O1                               | 2.0962 (17)  | Co1—N1                               | 2.1357 (15)  |
| Co1—O1 <sup>i</sup>                  | 2.0962 (17)  | Co1—N2 <sup>i</sup>                  | 2.0882 (16)  |
| Co1—N1 <sup>i</sup>                  | 2.1357 (15)  | Co1—N2                               | 2.0882 (16)  |
| O1—Co1—O1 <sup>i</sup>               | 180.0        | N2 <sup>i</sup> —Co1—O1 <sup>i</sup> | 91.22 (7)    |
| O1 <sup>i</sup> —Co1—N1 <sup>i</sup> | 90.17 (7)    | N2 <sup>i</sup> —Co1—N1 <sup>i</sup> | 77.80 (6)    |
| O1—Co1—N1                            | 90.17 (7)    | N2 <sup>i</sup> —Co1—N1              | 102.20 (6)   |
| O1 <sup>i</sup> —Co1—N1              | 89.83 (7)    | N2—Co1—N1 <sup>i</sup>               | 102.20 (6)   |
| O1—Co1—N1 <sup>i</sup>               | 89.83 (7)    | N2—Co1—N1                            | 77.80 (6)    |
| N1 <sup>i</sup> —Co1—N1              | 180.0        | N2 <sup>i</sup> —Co1—N2              | 180.0        |
| N2 <sup>i</sup> —Co1—O1              | 88.78 (7)    | Co1—O1—H1A                           | 120 (2)      |
| N2—Co1—O1 <sup>i</sup>               | 88.78 (7)    | Co1—O1—H1B                           | 124 (2)      |
| N2—Co1—O1                            | 91.22 (7)    |                                      |              |

Symmetry code: (i)  $-x, -y+1, -z$ .



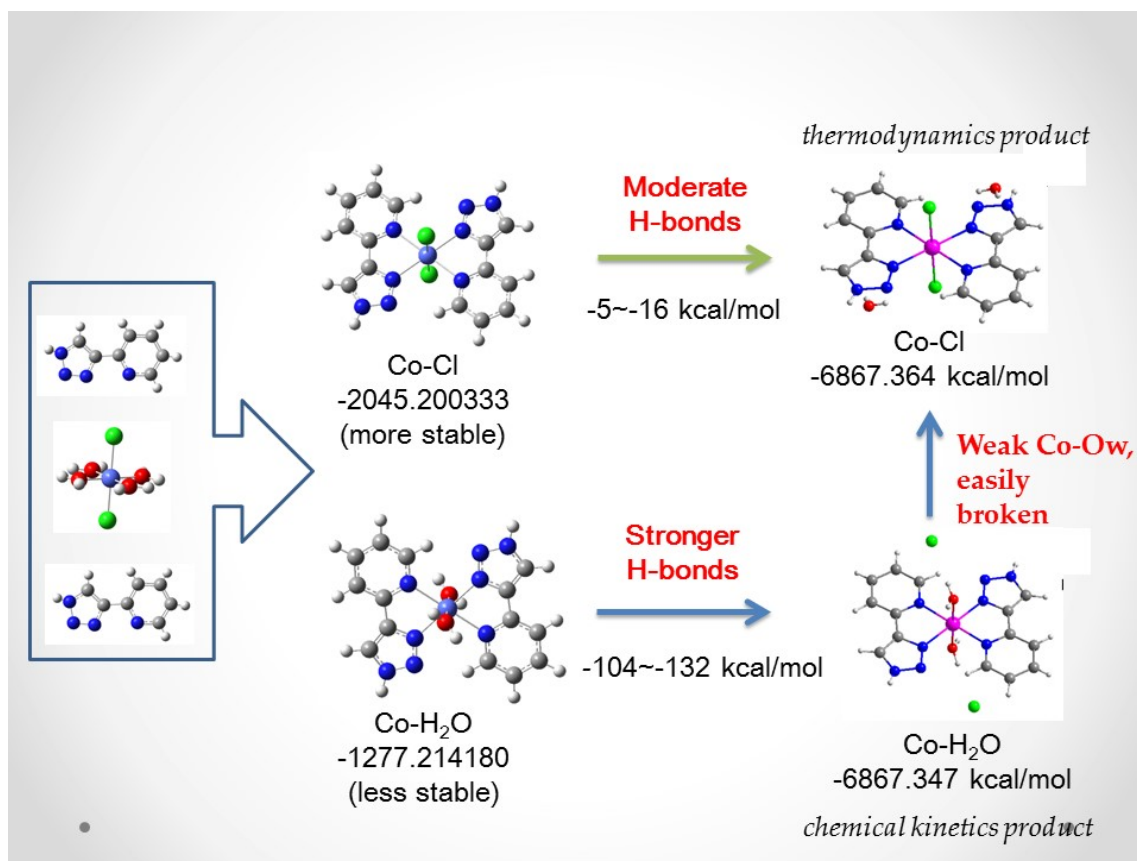

Figure S9 Proposed Formation Process.

## UV-vis spectra of Co-Cl and Co-H<sub>2</sub>O

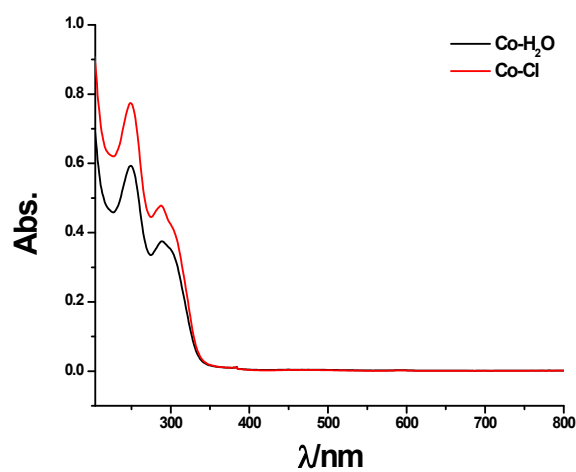

**Figure S10** UV-Vis spectra for diluted sample.

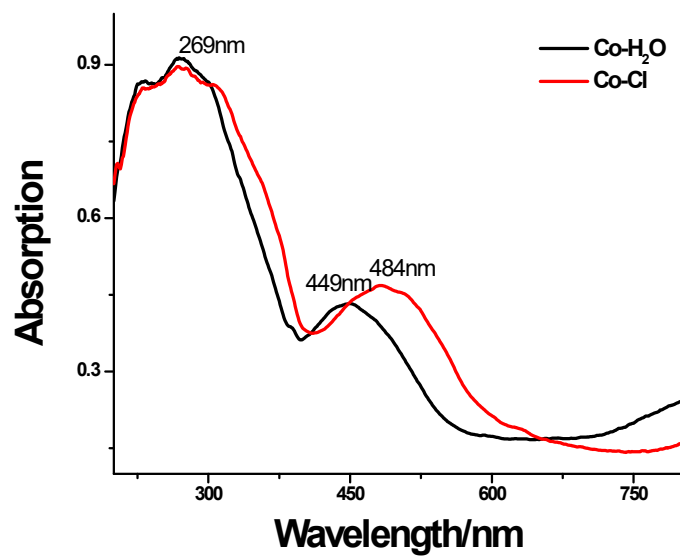

**Figure S11** Diffuse reflectance spectroscopy of Co-Cl and Co-H<sub>2</sub>O

## IR spectra of Co-Cl and Co-H<sub>2</sub>O

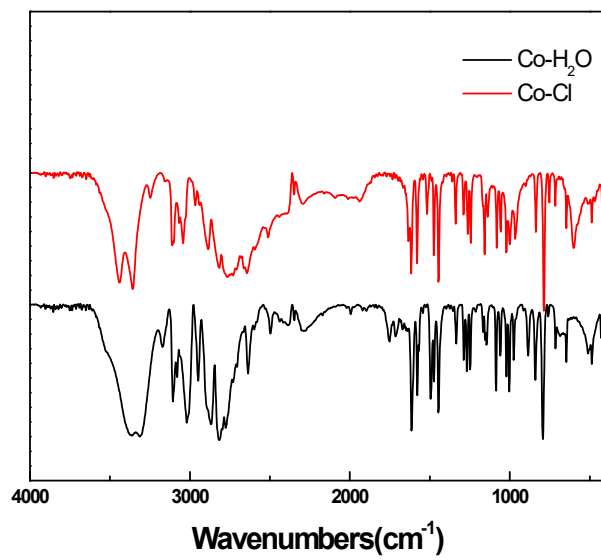

**Figure S12** IR spectrum for **Co-Cl** and **Co-H<sub>2</sub>O**.
